# Supplementary material
Source: HighWire-hosted journal article supplement (https://www.cmajopen.ca/highwire/filestream/90754/field_highwire_adjunct_files/1/open-2022-0116-original-submission.pdf)
Supplement: open-2022-0116-original-submission.pdf [file open-2022-0116-original-submission.pdf]

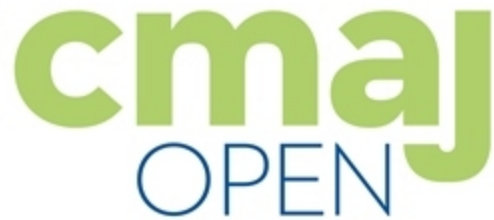

**Prevalence of self-reported visual impairment in Canadians with and without diabetes: findings from population-based surveys from 1994 to 2014**

|                               |                                                                                                                                                                                                                                                                                                                                                                                                                                                                                                                                                                                                                                                                                                                                                                                                                                                                                                                                                                  |
|-------------------------------|------------------------------------------------------------------------------------------------------------------------------------------------------------------------------------------------------------------------------------------------------------------------------------------------------------------------------------------------------------------------------------------------------------------------------------------------------------------------------------------------------------------------------------------------------------------------------------------------------------------------------------------------------------------------------------------------------------------------------------------------------------------------------------------------------------------------------------------------------------------------------------------------------------------------------------------------------------------|
| Journal:                      | <i>CMAJ Open</i>                                                                                                                                                                                                                                                                                                                                                                                                                                                                                                                                                                                                                                                                                                                                                                                                                                                                                                                                                 |
| Manuscript ID                 | CMAJOpen-2022-0116                                                                                                                                                                                                                                                                                                                                                                                                                                                                                                                                                                                                                                                                                                                                                                                                                                                                                                                                               |
| Manuscript Type:              | Cross-sectional                                                                                                                                                                                                                                                                                                                                                                                                                                                                                                                                                                                                                                                                                                                                                                                                                                                                                                                                                  |
| Date Submitted by the Author: | 20-May-2022                                                                                                                                                                                                                                                                                                                                                                                                                                                                                                                                                                                                                                                                                                                                                                                                                                                                                                                                                      |
| Complete List of Authors:     | Im, James; University of Toronto Dalla Lana School of Public Health, Trope, Graham; University of Toronto, Department of Ophthalmology and Vision Sciences<br>Buys, Yvonne; University of Toronto, Department of Ophthalmology and Vision Sciences<br>Yan, Peng; University of Toronto, Department of Ophthalmology and Vision Sciences, University of Toronto, Toronto, Canada<br>Brent, Michael; University of Toronto, Department of Ophthalmology and Vision Sciences, Department of Medicine<br>Liu, Sophia; Western University Schulich School of Medicine & Dentistry, Department of Family Medicine, Schulich School of Medicine and Dentistry, Western University, London, Canada<br>Jin, Yaping; University of Toronto, Department of Ophthalmology and Vision Sciences; University of Toronto Dalla Lana School of Public Health, Department of Public Health Sciences                                                                                |
| Keywords:                     | Diabetes, Epidemiology, Public health                                                                                                                                                                                                                                                                                                                                                                                                                                                                                                                                                                                                                                                                                                                                                                                                                                                                                                                            |
| More Detailed Keywords:       | visual impairment, prevalence, diabetes, population surveys, self-report                                                                                                                                                                                                                                                                                                                                                                                                                                                                                                                                                                                                                                                                                                                                                                                                                                                                                         |
| Abstract:                     | <p>Background: Visual impairment (VI) negatively impacts an individual's quality of life. Diabetes is a leading cause of VI. Approximately 1 in 11 Canadian adults are living with diabetes. We assessed trends in the prevalence of VI among Canadians with and without diabetes.</p> <p>Methods: Self-reported data from respondents aged 45+ in seven cycles of nationwide surveys (National Population Health Survey and Canadian Community Health Survey) from 1994/1995 to 2013/2014 were analyzed. The age- and sex-standardized prevalence of VI was calculated using the 2016 Canadian population as the standard. Comparisons by levels of education and income were assessed, utilising sex-standardised prevalence due to sparse data.</p> <p>Results: Among Canadians with diabetes, the age- and sex-standardized VI prevalence was 7.37% (95% confidence interval [CI] 5.31%-9.43%) in 1994/1997, decreasing to 3.03% (95% CI 2.48%-3.57%) in</p> |

1  
2  
3  
4  
5  
6  
7  
8  
9  
10  
11  
12  
13  
14  
15  
16  
17  
18  
19  
20  
21  
22  
23  
24  
25  
26  
27  
28  
29  
30  
31  
32  
33  
34  
35  
36  
37  
38  
39  
40  
41  
42  
43  
44  
45  
46  
47  
48  
49  
50  
51  
52  
53  
54  
55  
56  
57  
58  
59  
60

|  |                                                                                                                                                                                                                                                                                                                                                                                                                                                                                                                                                                                                                                                                                                                                                                                                                                                                       |
|--|-----------------------------------------------------------------------------------------------------------------------------------------------------------------------------------------------------------------------------------------------------------------------------------------------------------------------------------------------------------------------------------------------------------------------------------------------------------------------------------------------------------------------------------------------------------------------------------------------------------------------------------------------------------------------------------------------------------------------------------------------------------------------------------------------------------------------------------------------------------------------|
|  | <p>2013/2014, giving a standardized prevalence ratio (SPR) of 0.41 (95% CI 0.30-0.56) comparing 2013/2014 to 1994/1997. Among Canadians without diabetes, VI prevalence decreased from 3.72% (95% CI 3.31%-4.14%) in 1994/1997 to 1.69% (95% CI 1.52%-1.87%) in 2013/2014, with an SPR of 0.45 (95% CI 0.40-0.52). Decreased sex-standardized VI prevalence was observed among Canadians with high and low levels of education and incomes in both those with and without diabetes.</p> <p>Interpretation: VI prevalence was roughly two times higher in those with vs without diabetes. From 1994 to 2014, VI prevalence decreased in those with and without diabetes irrespective of education and income levels. These results suggest effective collective efforts by eye care clinicians, other medical clinicians, researchers, the public, and government.</p> |
|  |                                                                                                                                                                                                                                                                                                                                                                                                                                                                                                                                                                                                                                                                                                                                                                                                                                                                       |

SCHOLARONE™  
Manuscripts

STROBE Statement—Checklist of items that should be included in reports of *cross-sectional studies*

|                              | Item No | Recommendation                                                                                                                                                                                               | Page No |
|------------------------------|---------|--------------------------------------------------------------------------------------------------------------------------------------------------------------------------------------------------------------|---------|
| <b>Title and abstract</b>    | 1       | (a) Indicate the study's design with a commonly used term in the title or the abstract                                                                                                                       | 1,3     |
|                              |         | (b) Provide in the abstract an informative and balanced summary of what was done and what was found                                                                                                          | 3       |
| <b>Introduction</b>          |         |                                                                                                                                                                                                              |         |
| Background/rationale         | 2       | Explain the scientific background and rationale for the investigation being reported                                                                                                                         | 5       |
| Objectives                   | 3       | State specific objectives, including any prespecified hypotheses                                                                                                                                             | 5       |
| <b>Methods</b>               |         |                                                                                                                                                                                                              |         |
| Study design                 | 4       | Present key elements of study design early in the paper                                                                                                                                                      | 5       |
| Setting                      | 5       | Describe the setting, locations, and relevant dates, including periods of recruitment, exposure, follow-up, and data collection                                                                              | 5,6     |
| Participants                 | 6       | (a) Give the eligibility criteria, and the sources and methods of selection of participants                                                                                                                  | 6       |
| Variables                    | 7       | Clearly define all outcomes, exposures, predictors, potential confounders, and effect modifiers. Give diagnostic criteria, if applicable                                                                     | 6,7     |
| Data sources/<br>measurement | 8*      | For each variable of interest, give sources of data and details of methods of assessment (measurement). Describe comparability of assessment methods if there is more than one group                         | 6,7     |
| Bias                         | 9       | Describe any efforts to address potential sources of bias                                                                                                                                                    | 8       |
| Study size                   | 10      | Explain how the study size was arrived at                                                                                                                                                                    | 6,7     |
| Quantitative variables       | 11      | Explain how quantitative variables were handled in the analyses. If applicable, describe which groupings were chosen and why                                                                                 | 6,7     |
| Statistical methods          | 12      | (a) Describe all statistical methods, including those used to control for confounding                                                                                                                        | 8       |
|                              |         | (b) Describe any methods used to examine subgroups and interactions                                                                                                                                          | 8       |
|                              |         | (c) Explain how missing data were addressed                                                                                                                                                                  | 8       |
|                              |         | (d) If applicable, describe analytical methods taking account of sampling strategy                                                                                                                           | 8       |
|                              |         | (e) Describe any sensitivity analyses                                                                                                                                                                        | NA      |
| <b>Results</b>               |         |                                                                                                                                                                                                              |         |
| Participants                 | 13*     | (a) Report numbers of individuals at each stage of study—eg numbers potentially eligible, examined for eligibility, confirmed eligible, included in the study, completing follow-up, and analysed            | 9       |
|                              |         | (b) Give reasons for non-participation at each stage                                                                                                                                                         | NA      |
|                              |         | (c) Consider use of a flow diagram                                                                                                                                                                           | NA      |
| Descriptive data             | 14*     | (a) Give characteristics of study participants (eg demographic, clinical, social) and information on exposures and potential confounders                                                                     | 9       |
|                              |         | (b) Indicate number of participants with missing data for each variable of interest                                                                                                                          | 9       |
| Outcome data                 | 15*     | Report numbers of outcome events or summary measures                                                                                                                                                         | 9       |
| Main results                 | 16      | (a) Give unadjusted estimates and, if applicable, confounder-adjusted estimates and their precision (eg, 95% confidence interval). Make clear which confounders were adjusted for and why they were included | 9-11    |

1  
2  
3  
4  
5  
6  
7  
8  
9  
10  
11  
12  
13  
14  
15  
16  
17  
18  
19  
20  
21  
22  
23  
24  
25  
26  
27  
28  
29  
30  
31  
32  
33  
34  
35  
36  
37  
38  
39  
40  
41  
42  
43  
44  
45  
46  
47  
48  
49  
50  
51  
52  
53  
54  
55  
56  
57  
58  
59  
60

|                          |    |                                                                                                                                                                            |       |
|--------------------------|----|----------------------------------------------------------------------------------------------------------------------------------------------------------------------------|-------|
|                          |    | (b) Report category boundaries when continuous variables were categorized                                                                                                  | 7     |
|                          |    | (c) If relevant, consider translating estimates of relative risk into absolute risk for a meaningful time period                                                           | NA    |
| Other analyses           | 17 | Report other analyses done—eg analyses of subgroups and interactions, and sensitivity analyses                                                                             | 9-11  |
| <b>Discussion</b>        |    |                                                                                                                                                                            |       |
| Key results              | 18 | Summarise key results with reference to study objectives                                                                                                                   | 11,12 |
| Limitations              | 19 | Discuss limitations of the study, taking into account sources of potential bias or imprecision. Discuss both direction and magnitude of any potential bias                 | 13,14 |
| Interpretation           | 20 | Give a cautious overall interpretation of results considering objectives, limitations, multiplicity of analyses, results from similar studies, and other relevant evidence | 11-14 |
| Generalisability         | 21 | Discuss the generalisability (external validity) of the study results                                                                                                      | 11,12 |
| <b>Other information</b> |    |                                                                                                                                                                            |       |
| Funding                  | 22 | Give the source of funding and the role of the funders for the present study and, if applicable, for the original study on which the present article is based              | 15    |

\*Give information separately for exposed and unexposed groups.

**Note:** An Explanation and Elaboration article discusses each checklist item and gives methodological background and published examples of transparent reporting. The STROBE checklist is best used in conjunction with this article (freely available on the Web sites of PLoS Medicine at <http://www.plosmedicine.org/>, Annals of Internal Medicine at <http://www.annals.org/>, and Epidemiology at <http://www.epidem.com/>). Information on the STROBE Initiative is available at [www.strobe-statement.org](http://www.strobe-statement.org).

1  
2  
3 Research Paper  
4

5 **Title:** Prevalence of self-reported visual impairment in Canadians with and without diabetes:  
6 findings from population-based surveys from 1994 to 2014  
7  
8

9  
10 **Full Author Details:**

11 James H.B. Im, MPH<sup>1</sup>  
12 Graham E. Trope, MD<sup>2</sup>  
13 Yvonne M. Buys, MD<sup>2</sup>  
14 Peng Yan, MD<sup>2,3</sup>  
15 Michael H. Brent, MD<sup>2</sup>  
16 Sophia Y. Liu, MD<sup>4</sup>  
17 Ya-Ping Jin, MD<sup>1,2\*</sup>  
18  
19  
20

21  
22 **Author Affiliations:**

23 <sup>1</sup>Dalla Lana School of Public Health, University of Toronto, Toronto, Canada  
24 <sup>2</sup>Department of Ophthalmology and Vision Sciences, University of Toronto, Toronto, Canada  
25 <sup>3</sup>Kensington Vision and Research Centre, Toronto, Canada  
26 <sup>4</sup>Department of Family Medicine, Schulich School of Medicine and Dentistry, Western University,  
27 London, Canada  
28

29  
30 **\*Corresponding Author:**

31 Ya-Ping Jin, MD, PhD  
32 Department of Ophthalmology and Vision Sciences  
33 University of Toronto  
34 340 College Street, Suite 400  
35 Toronto, Ontario, Canada  
36 M5T 1S8  
37 Telephone: 416-978-7938  
38 E-mail: yaping.jin@utoronto.ca  
39  
40

41 **Acknowledgements:**

42 The authors acknowledge that the data used in this publication are from the National Population  
43 Health Survey in 1994-1995, 1996-1997, 1998-1999, and the Canadian Community Health  
44 Surveys in 2000-2001, 2008-2009, 2009-2010, 2013-2014. Both surveys were run by Statistics  
45 Canada. The authors thank all participants of these surveys and the staff from Statistics Canada  
46 who assisted in the survey data collection and management.  
47  
48

49 This research was supported by funds from the Canadian Research Data Centre Network  
50 (CRDCN) from the Social Science and Humanities Research Council (SSHRC), the Canadian  
51 Institute for Health Research (CIHR), the Canadian Foundation for Innovation (CFI), and Statistics  
52 Canada.  
53  
54  
55  
56  
57

1  
2  
3 Although the research and analysis are based on data from Statistics Canada, the opinions  
4 expressed do not represent the views of Statistics Canada or the Canadian Research Data Centre  
5 Network (CRDCN).  
6

7  
8 **Meeting Presentation:** The study abstract was presented at the Association for Research in Vision  
9 & Ophthalmology (ARVO) Annual Meeting in May 2021 and the Canadian Ophthalmological  
10 Society (COS) Annual Meeting in June 2021, both presented online due to the COVID-19  
11 pandemic.  
12

13 **Word Counts**

14 Abstract: 250  
15 Manuscript text: 2440  
16 Number of Tables: 2  
17 Number of Figures: 3  
18  
19  
20  
21  
22  
23  
24  
25  
26  
27  
28  
29  
30  
31  
32  
33  
34  
35  
36  
37  
38  
39  
40  
41  
42  
43  
44  
45  
46  
47  
48  
49  
50  
51  
52  
53  
54  
55  
56  
57  
58  
59  
60

Confidential

## Abstract

**Background:** Visual impairment (VI) negatively impacts an individual's quality of life. Diabetes is a leading cause of VI. Approximately 1 in 11 Canadian adults are living with diabetes. We assessed trends in the prevalence of VI among Canadians with and without diabetes.

**Methods:** Self-reported data from respondents aged 45+ in seven cycles of nationwide surveys (National Population Health Survey and Canadian Community Health Survey) from 1994/1995 to 2013/2014 were analyzed. The age- and sex-standardized prevalence of VI was calculated using the 2016 Canadian population as the standard. Comparisons by levels of education and income were assessed, utilising sex-standardised prevalence due to sparse data.

**Results:** Among Canadians with diabetes, the age- and sex-standardized VI prevalence was 7.37% (95% confidence interval [CI] 5.31%-9.43%) in 1994/1997, decreasing to 3.03% (95% CI 2.48%-3.57%) in 2013/2014, giving a standardized prevalence ratio (SPR) of 0.41 (95% CI 0.30-0.56) comparing 2013/2014 to 1994/1997. Among Canadians without diabetes, VI prevalence decreased from 3.72% (95% CI 3.31%-4.14%) in 1994/1997 to 1.69% (95% CI 1.52%-1.87%) in 2013/2014, with an SPR of 0.45 (95% CI 0.40-0.52). Decreased sex-standardized VI prevalence was observed among Canadians with high and low levels of education and incomes in both those with and without diabetes.

**Interpretation:** VI prevalence was roughly two times higher in those with vs without diabetes. From 1994 to 2014, VI prevalence decreased in those with and without diabetes irrespective of

1  
2  
3  
4  
5  
6  
7  
8  
9  
10  
11  
12  
13  
14  
15  
16  
17  
18  
19  
20  
21  
22  
23  
24  
25  
26  
27  
28  
29  
30  
31  
32  
33  
34  
35  
36  
37  
38  
39  
40  
41  
42  
43  
44  
45  
46  
47  
48  
49  
50  
51  
52  
53  
54  
55  
56  
57  
58  
59  
60

education and income levels. These results suggest effective collective efforts by eye care clinicians, other medical clinicians, researchers, the public, and government.

**Trial registration:** Not applicable

**Key words:** Visual impairment, prevalence, diabetes, population surveys, self-report

Confidential



1  
2  
3 Visual impairment (VI) is recognised as a major public health issue due to its significant impacts  
4 on independence, risk of accidents/injuries, falls, depression, and quality of life.<sup>1-4</sup> Diabetes is a  
5 leading cause of VI in developed countries, particularly in working-age individuals, owing to the  
6 development of diabetic retinopathy and diabetic macular edema.<sup>5</sup> In Canada the prevalence of  
7 diabetes increased 37.3% between 2003/2004 and 2013/2014, with an annual increase rate of  
8 1.2% since 2010.<sup>6</sup> Approximately 3.2 million Canadians, or 1 in 11 adults aged 20+, were living  
9 with diabetes in 2016/2017.<sup>7</sup>

10  
11  
12 Given the fast-rising prevalence of diabetes in recent decades, it is important to know whether  
13 the prevalence of VI has also increased. This will help us understand the magnitude and burden  
14 of VI, guide necessary health and social service planning, and aid in the development of  
15 strategies and policies for VI prevention and management. We assessed time trends in VI  
16 prevalence among Canadians with and without diabetes over the past two decades and  
17 determined if the trends were similar amongst Canadians with different levels of education and  
18 income.

## 19 20 21 **Methods**

### 22 *Setting and Study Design*

23 The study setting included the 10 provinces of Canada. The study design was repeated,  
24 population-based, cross-sectional surveys conducted in 1994/1995, 1996/1997, 1998/1999,  
25 2000/2001, 2008/2009, 2009/2010, and 2013/2014.

### 26 *Data Source and Participants*

1  
2  
3 Data analyzed were obtained from seven cycles of nationwide surveys: the 1994/1995, 1996/1997  
4 and 1998/1999 cycles of the National Population Health Survey (NPHS) and the 2000/2001,  
5  
6  
7 2008/2009 Healthy Aging, 2009/2010 and 2013/2014 cycles of the Canadian Community Health  
8  
9 Survey (CCHS).  
10  
11  
12  
13

14 The CCHS and NPHS are cross-sectional surveys with participants randomly selected across the  
15 country by Statistics Canada. The surveys covered 98% of Canadians aged 12+ living in private  
16 dwellings.<sup>8,9</sup> Overall response rates ranged from 69.7% to 92.8% for the NPHS and 72.3% to  
17  
18 87.3% for the CCHS.<sup>8,10-15</sup> Only respondents aged 45+ were included in the analysis since VI is an  
19  
20 age-related condition and the CCHS 2008/2009 Healthy Aging cycle only included individuals  
21  
22 aged 45+.<sup>16</sup>  
23  
24  
25  
26  
27  
28  
29  
30

### 31 *Outcome Measure*

32  
33 The study outcome was self-reported VI. This information was obtained from the survey  
34  
35 questions:  
36  
37

- 38 *1. Are you usually able to see well enough to read ordinary newsprint without glasses or*  
39 *contact lenses?*
- 40 *2. Are you usually able to see well enough to read ordinary newsprint with glasses or*  
41 *contact lenses?*
- 42 *3. Are you able to see at all?*
- 43 *4. Are you able to see well enough to recognize a friend on the other side of the street*  
44 *without glasses or contact lenses?*
- 45 *5. Are you usually able to see well enough to recognize a friend on the other side of the*  
46 *street with glasses or contact lenses?*  
47  
48  
49  
50  
51  
52  
53  
54  
55  
56  
57

1  
2  
3 In this analysis, respondents who provided a negative response to questions 2, 3, or 5 were  
4 considered as having self-reported VI. Respondents with a positive answer to the above  
5 questions were categorized as not having self-reported VI.  
6  
7  
8  
9  
10

### 11 *Diabetes Measure*

12  
13  
14 Participants who self-reported that they had diabetes diagnosed by a health professional were  
15 considered as having diabetes. Conversely, those who responded as not having diabetes diagnosed  
16 by a health professional were deemed as not having diabetes.  
17  
18  
19  
20  
21

### 22 *Other Measures*

23  
24  
25 Participant age and sex was self-reported. Information on the highest level of education attained  
26 by participants was obtained through a series of questions and was categorized by Statistics Canada  
27 into four levels: “Less than secondary school graduation”, “Secondary school graduation, no post-  
28 secondary”, “Some post-secondary education”, and “Post-secondary certificate/diploma or  
29 university degree”.<sup>17</sup> In this analysis, we further consolidated participants into low (less than  
30 secondary school graduation or secondary school graduation) and high (some post-secondary  
31 education or post-secondary certificate/diploma or university degree) levels to avoid sparse data.  
32  
33  
34 Similarly, data on total household income was collected through a series of questions by Statistics  
35 Canada, which were grouped into low (below middle) and mid/high (middle or higher) levels of  
36 household income for each survey (See details in Table 1 footnote).  
37  
38  
39  
40  
41  
42  
43  
44  
45  
46  
47  
48  
49  
50

### 51 *Statistical Analyses*

1  
2  
3 The prevalence of VI was calculated as the proportion of individuals with VI among all  
4 respondents. Prevalence estimates were stratified by diabetes status as well as level of education  
5 and household income. Survey weights provided by Statistics Canada were used in all analyses to  
6 account for sample selection, complex survey design, and adjust for seasonal effects, post-  
7 stratification, non-response and calibration.<sup>18</sup> Weighted data are more representative of the  
8 surveyed population and are required by Statistics Canada when reporting population estimates.<sup>18</sup>  
9 Weighted prevalence estimates and 95% confidence intervals (CIs) were directly age- and sex-  
10 standardized to the 2016 Canadian census to allow for valid comparisons.<sup>19</sup> For analyses stratified  
11 by levels of education and income, only sex-standardized prevalence was calculated due to small  
12 sample sizes when stratifying by both age and sex. The standard errors and associated 95% CIs of  
13 prevalence estimates were calculated using the bootstrap weights provided by Statistics Canada.  
14 Due to small cell sizes, the 1994/1995 and 1996/1997 cycles of the NPHS and the 1998/1999 and  
15 2000/2001 cycles of the NPHS and CCHS were combined for calculating overall prevalence  
16 estimates and education-stratified estimates.<sup>20</sup> For similar reasons, the 1998/1999 cycle of the  
17 NPHS was combined with the 2000/2001 cycle of the CCHS for calculating income-stratified  
18 estimates. Standardized prevalence ratios (SPR) and associated 95% CIs were calculated to  
19 compare the prevalence of VI in 2013/2014 versus 1994/1997.<sup>21</sup> Additive and multiplicative  
20 interaction for education-diabetes and income-diabetes were assessed.<sup>22</sup> Participants who  
21 answered “Don’t know” or refused to answer the relevant questions were treated as missing values  
22 and were excluded from the analyses. All statistical analyses were conducted using SAS 9.4 (SAS  
23 Institute, Inc., Cary, NC).

### 24 *Ethics Approval*

1  
2  
3 Informed consent was obtained by Statistics Canada from all survey participants. This study was  
4  
5 approved by the University of Toronto Research Ethics Board.  
6  
7  
8  
9

## 10 **Results**

### 11 *Participant Characteristics*

12  
13  
14 The unweighted number of participants who had a valid answer to VI ranged from 6,930 in  
15  
16 1998/1999 to 75,808 in 2013/2014. For diabetes, this number ranged from 6,947 in 1998/1999 to  
17  
18 77,032 in 2013/2014. Unweighted missing values were 17-1,224 (0.00%-0.02%) for VI and 1-  
19  
20 127 (0.00%-0.00%) for diabetes.  
21  
22  
23  
24  
25

26 The characteristics of participants with and without diabetes are shown in **Table 1**. The weighted  
27  
28 number of Canadians with diabetes aged 45+ increased from 607,100 in 1994/1995 to 1,772,200  
29  
30 in 2013/2014. Among Canadians with diabetes, the weighted number of individuals with VI  
31  
32 decreased from 57,200 in 1994/1995 to 53,900 in 2013/2014. Among those without diabetes, the  
33  
34 number of individuals with VI decreased from 344,400 in 1994/1995 to 205,900 in 2013/2014.  
35  
36 Missing values for included variables ranged from 0% for age and sex to 18.9% for income.  
37  
38  
39  
40  
41

### 42 *Overall Trends in the Prevalence of VI*

43  
44 The trend in the age- and sex-standardized VI prevalence among people with and without  
45  
46 diabetes is shown in Figure 1. In all survey years, the prevalence of VI was about two times  
47  
48 higher among Canadians with diabetes than those without. A consistently decreasing VI  
49  
50 prevalence was observed among both with and without diabetes groups. Among those with  
51  
52 diabetes, the prevalence of VI decreased from 7.37% (95% CI 5.31%-9.43%) in 1994/1997 to  
53  
54  
55  
56  
57  
58  
59  
60

1  
2  
3 3.02% (95% CI 2.48%-3.57%) in 2013-2014, giving an SPR of 0.41 (95% CI 0.30-0.56) for  
4  
5 2013/2014 versus 1994/1997. Among those without diabetes, the prevalence of VI decreased  
6  
7 from 3.72% (95% CI 3.31%-4.14%) in 1994-1997 to 1.69% (95% CI 1.52%-1.87%) in 2013-  
8  
9 2014, with an SPR of 0.45 (95% CI 0.40-0.52) for 2013/2014 versus 1994/1997.  
10  
11  
12  
13

#### 14 *Trends in the Prevalence of VI Stratified by Levels of Education and Diabetes Status*

15  
16  
17 Figure 2 shows a decreasing prevalence of VI in all subgroups stratified by level of education  
18  
19 and diabetes status from 1994 to 2014. In the low-education stratum, the sex-standardized  
20  
21 prevalence of VI decreased from 9.96% (95% CI 6.91%-13.02%) in 1994-1997 to 3.57% (95%  
22  
23 CI 2.84%-4.29%) in 2013-2014 for those with diabetes, and from 4.16% (95% CI 3.52%-4.79%)  
24  
25 in 1994-1997 to 2.18% (95% CI 1.87%-2.48%) in 2013-2014 for those without diabetes. In the  
26  
27 high-education stratum, the VI prevalence similarly decreased from 6.04% (95% CI 2.20%-  
28  
29 9.88%) in 1994-1997 to 3.06% (95% CI 2.21%-3.91%) in 2013/2014 for those with diabetes, and  
30  
31 from 2.68% (95% CI 2.19%-3.17%) in 1994/1997 to 1.21% (95% CI 1.01%-1.41%) in 2013-  
32  
33 2014 for those without diabetes.  
34  
35  
36  
37  
38  
39

40  
41 Figure 2 also shows that the sex-standardized VI prevalence was highest in Canadians with low  
42  
43 levels of education and diabetes, and lowest in those with high levels of education and no  
44  
45 diabetes in all survey years, except for 1998/2001. Evaluations of interactions regarding the joint  
46  
47 presence of low levels of education and having diabetes on the prevalence of VI are shown in  
48  
49 Table 2 (upper part). In 2013-2014, the observed SPR for joint presence of low level of  
50  
51 education and diabetes was smaller than the expected joint SPR from both the additive (2.36 vs  
52  
53 2.82) and multiplicative model (2.95 vs 4.56), indicating the presence of negative additive and  
54  
55  
56  
57  
58  
59  
60

1  
2  
3 negative multiplicative interaction. Thus, interventions for VI tailored specifically to those with  
4 low levels of education and diabetes might not have a larger effect.  
5  
6  
7  
8  
9

### 10 *Trends in Prevalence of VI Stratified by Levels of Household Income and Diabetes Status*

11 Similar to the results grouped by level of education and diabetes status, a decreased VI  
12 prevalence over time was observed after stratification by household income level and diabetes  
13 status (Figure 3). The highest sex-standardized VI prevalence was found in Canadians with low  
14 levels of household income and diabetes, and the lowest in those with high levels of income and  
15 no diabetes in all survey years, except for 1998/2001. Evaluation of the interaction between the  
16 joint presence of low level of household income and diabetes on the prevalence of VI are shown  
17 in Table 2 (lower part). In 2013/2014, there was evidence of positive additive interaction  
18 (observed SPR of 3.39 vs. expected SPR of 2.86), suggesting VI interventions targeting those  
19 with low levels of household income and diabetes may likely yield a benefit larger than expected  
20 based on the additive model.  
21  
22  
23  
24  
25  
26  
27  
28  
29  
30  
31  
32  
33  
34  
35  
36  
37  
38  
39

### 40 **Interpretation**

41 This study assessed VI trends amongst Canadians with and without diabetes over two decades.  
42 We report that while the number of Canadians aged 45+ with diabetes nearly tripled from  
43 1994/1995 (607,100) to 2013/2014 (1,772,200), the number of people with VI amongst those  
44 with diabetes decreased (57,200 in 1994/1995 to 53,900 in 2013/2014). Among both people with  
45 and without diabetes, the age- and sex-adjusted VI prevalence decreased by more than half, with  
46 an SPR of 0.41 for those with diabetes and 0.45 for those without diabetes. Sex-adjusted analyses  
47 after stratification by education and income levels also showed a decreasing trend from 1994 to  
48  
49  
50  
51  
52  
53  
54  
55  
56  
57  
58  
59  
60

1  
2  
3 2014. Furthermore, we report the prevalence of VI was about two times higher in Canadians with  
4  
5 diabetes than those without in all survey years. The highest prevalence of VI was found in  
6  
7 Canadians with diabetes and low levels of education or income, and the lowest amongst those  
8  
9 without diabetes and with mid/high levels of education or income. In 2013/2014, a positive  
10  
11 additive interaction between diabetes and low levels of household income was noted. Thus, VI  
12  
13 interventions should be targeted at those with diabetes and low levels of household income.  
14  
15  
16  
17  
18

19 Our finding of decreased prevalence of VI from 1994 to 2014 complements reports from other  
20  
21 countries regarding VI.<sup>23,24</sup> In Europe, a meta-analysis by Delcourt *et al.* on the age-adjusted  
22  
23 prevalence of VI and blindness in individuals aged 55+ reported that VI prevalence decreased  
24  
25 from 2.22% for the period of 1991-2006 to 0.92% for the period of 2007-2012.<sup>23</sup> In another  
26  
27 meta-analysis, Flaxman *et al.* similarly reported that the age-adjusted prevalence of VI in people  
28  
29 aged 50+ decreased from 1990 to 2015 globally.<sup>24</sup> However, these reports did not distinguish  
30  
31 between people with and without diabetes, and used pooled data from different countries with  
32  
33 different healthcare systems. Using data from Canada, which has universal healthcare, we report  
34  
35 that VI prevalence decreased in people with and without diabetes from 1994 to 2014, irrespective  
36  
37 of their level of education and income. We believe these results likely reflect the collective  
38  
39 efforts by eye care clinicians, other medical clinicians, researchers, the public, and government  
40  
41 to prevent vision loss.  
42  
43  
44  
45  
46  
47  
48

49 Our results also agree with studies that have reported a significantly higher prevalence of VI in  
50  
51 people with diabetes than those without.<sup>25-27</sup> We report that despite the prevalence of VI  
52  
53 continuously decreasing over time, the prevalence of VI in the most recent survey year  
54  
55  
56  
57



1  
2  
3 2013/2014 was still significantly higher in Canadians with diabetes vs. those without (3.03% vs.  
4  
5 1.69%). This demonstrates that diabetes is still a major cause of VI in Canada. Preventing and  
6  
7 treating diabetes and diabetic retinopathy needs to remain a priority in Canada. Amongst those  
8  
9 with diabetes, early detection, good blood sugar control, and treatment of VI through screening  
10  
11 programs and diabetic eye exams are essential to protect vision, since vision loss from diabetic  
12  
13 retinopathy and diabetic macular edema can be irreversible. Low income earners with diabetes  
14  
15 are less likely to utilise recommended diabetic eye examinations despite universal health  
16  
17 coverage.<sup>28-30</sup> Reported barriers include limited accessibility to eye care clinicians due to  
18  
19 geographic challenges and lack of knowledge about eye screening services.<sup>31-33</sup> Programs to  
20  
21 increase the uptake of diabetic eye exams, particularly those aimed at poor neighborhoods,  
22  
23 including diabetic eye screening services in primary care settings (e.g. the tele-retinal screening  
24  
25 program in Toronto) are effective and highly recommended.<sup>34</sup>  
26  
27  
28  
29  
30  
31  
32

### 33 *Limitations*

34  
35 This study has several limitations. First, information on VI was self-reported, not clinically  
36  
37 confirmed, and in some cases may be correctable through corrective eyewear and surgery.  
38  
39 However, regardless of whether the reported VI is correctable, people continue to live with this  
40  
41 condition, which reflects real-life vision challenges faced by many individuals. Second, although  
42  
43 self-reported diabetes has an excellent specificity (87.8%-98.6%), it has only a moderate  
44  
45 sensitivity (41.5%-70.4%).<sup>35-37</sup> Moderate sensitivity may lead to misclassification of some  
46  
47 individuals with diabetes as not having diabetes, resulting in an over-estimation of VI  
48  
49 prevalence. However, we are not aware of evidence that suggests the validity of self-reported  
50  
51 diabetes changes with time. Therefore, we do not think misclassification of self-reported diabetes  
52  
53  
54  
55  
56  
57  
58  
59  
60

1  
2  
3 would impact the decreasing trend reported. Third, the most recent data available on VI is the  
4  
5 CCHS 2013/2014 due to survey content changes by Statistics Canada. Although VI data from  
6  
7 more recent years are desirable, our results provide a 20-year historic picture for use in future  
8  
9 comparisons.  
10

### 11 *Conclusion*

12  
13  
14  
15  
16  
17 In conclusion, the prevalence of VI in Canada is higher in people with diabetes versus those  
18  
19 without. Overall, the prevalence of VI in Canada decreased from 1994 to 2014. This trend was  
20  
21 observed in all subgroups stratified by diabetes status and level of education and income.  
22  
23  
24 Statistics Canada should be encouraged to keep VI questions in future surveys to allow for  
25  
26 ongoing analysis of the vision health of Canadians. To reduce VI burden in Canada, efforts and  
27  
28 research should continue to focus on diabetes education, treatment and prevention as well as  
29  
30 improving access to diabetic eye exams particularly for those from lower-income households.  
31  
32  
33  
34  
35  
36  
37  
38  
39  
40  
41  
42  
43  
44  
45  
46  
47  
48  
49  
50  
51  
52  
53  
54  
55  
56  
57  
58  
59  
60

1  
2  
3 **Acknowledgments:** None.  
4  
5

6 **Funding:** This research was supported by funds to the Canadian Research Data Centre Network  
7 from the Social Sciences and Humanities Research Council, the Canadian Institutes of Health  
8 Research, the Canadian Foundation for Innovation and Statistics Canada.  
9

10  
11 **Author Contributions:** James H.B. Im led data analyses, drafted and revised the manuscript,  
12 and prepared tables and figures. Ya-Ping Jin, Graham E. Trope, Yvonne M. Buys, Peng Yan,  
13 Michael H. Brent, and Sophia Y. Liu conceived the study. Ya-Ping Jin designed the study,  
14 acquired data access, resolved analysis related issues and led the manuscript revision. All authors  
15 contributed to data interpretation, revised the manuscript critically for important intellectual  
16 content, gave final approval of the version to be published and agreed to act as guarantors of this  
17 work and take responsibility for the contents of the article.  
18  
19  
20

21  
22 **Data Sharing:** Access to this third-party data set is through the Statistics Canada Research Data  
23 Centres (RDCs) Program, which has centres at universities across Canada. Research Data  
24 Centres are operated under the provisions of the Canadian Statistics Act, which states that  
25 persons retained under contract to perform special services under this act are deemed to be  
26 persons employed under this act while performing those services, in accordance with all the  
27 confidentiality rules. Anyone may apply to access the data by submitting a research proposal that  
28 justifies the need for access to confidential microdata to address a question that has relevance for  
29 the Canadian population. On approval, researchers undergo a deeming process, and a contract is  
30 granted. Thus, access to the data is granted on a need-to-know basis. For those interested in  
31 obtaining access to these data sets, detailed contact information and application processes to gain  
32 access and guidelines to use RDC data can be found at [https://](https://www.statcan.gc.ca/eng/rdc/process)  
33 [www.statcan.gc.ca/eng/rdc/process](https://www.statcan.gc.ca/eng/rdc/process).  
34  
35  
36  
37  
38  
39  
40  
41  
42  
43  
44  
45  
46  
47  
48  
49  
50  
51  
52  
53  
54  
55  
56  
57  
58  
59  
60

## References

1. Hong T, Mitchell P, Burlutsky G, Samarawickrama C, Wang JJ. Visual Impairment and the Incidence of Falls and Fractures Among Older People: Longitudinal Findings From the Blue Mountains Eye Study. *Invest Ophthalmol Vis Sci.* 2014;55(11):7589-93.
2. Yip JLY, Khawaja AP, Broadway D, Luben R, Hayat S, Dalzell N, et al. Visual acuity, self-reported vision and falls in the EPIC-Norfolk Eye study. *Br J Ophthalmol.* 2014;98(3):377-82.
3. Jin Y-P, Wong DT. Self-reported visual impairment in elderly Canadians and its impact on healthy living. *Can J Ophthalmol.* 2008;43(4):407-13.
4. Crews JE, Chou CF, Zack MM, Zhang X, Bullard KM, Morse AR, et al. The Association of Health-Related Quality of Life with Severity of Visual Impairment among People Aged 40–64 Years: Findings from the 2006–2010 Behavioral Risk Factor Surveillance System. *Ophthalmic Epidemiol.* 2016;23(3):145-53.
5. Diabetes Canada Clinical Practice Guidelines Expert Committee; Altomare F, Kherani A, Lovshin J. Retinopathy. *Can J Diabetes.* 2018;42 Suppl 1:S210-S216.
6. Government of Canada. Diabetes in Canada [Internet]. Ottawa (ON): Government of Canada; [updated 2020 Aug 17; cited 2022 Mar 26]. Available from: <https://www.canada.ca/en/public-health/services/publications/diseases-conditions/diabetes-canada-highlights-chronic-disease-surveillance-system.html>.
7. LeBlanc AG, Jun Gao Y, McRae L, Pelletier C. At-a-glance - Twenty years of diabetes surveillance using the Canadian Chronic Disease Surveillance System. *Health Promot Chronic Dis Prev Can.* 2019;39(11):306-9.
8. Statistics Canada. National Population Health Survey: Household Component, Cross-sectional (NPHS). Detailed Information for 1998-1999 [Internet]. Ottawa (ON): Statistics Canada; [updated 2007 Oct 24; cited 2021 Jan 10]. Available from: <https://www23.statcan.gc.ca/imdb/p2SV.pl?Function=getSurvey&SDDS=3236>.
9. Statistics Canada. Canadian Community Health Survey - Annual Component (CCHS) [Internet]. Ottawa (ON): Statistics Canada; [updated 2021 Dec 29; cited 2021 Jan 10]. Available from: <https://www.statcan.gc.ca/en/survey/household/3226>.
10. Statistics Canada. National Population Health Survey: Household Component, Cross-sectional (NPHS). Detailed Information for 1994-1995 [Internet]. Ottawa (ON): Statistics Canada; [updated 2007 Oct 24; cited 2021 Jan 10]. Available from: <https://www23.statcan.gc.ca/imdb/p2SV.pl?Function=getSurvey&Id=3732>.
11. Statistics Canada. National Population Health Survey: Household Component, Cross-sectional (NPHS). Detailed Information for 1996-1997 [Internet]. Ottawa (ON): Statistics Canada; [updated 2007 Oct 24; cited 2021 Jan 10]. Available from: <https://www23.statcan.gc.ca/imdb/p2SV.pl?Function=getSurvey&Id=4520>.
12. Statistics Canada. CCHS Cycle 1.1 (2000-2001), Public Use Microdata File Documentation. Ottawa (ON): Statistics Canada.
13. Statistics Canada. Canadian Community Health Survey (CCHS) – Healthy Aging User Guide. Ottawa (ON): Statistics Canada.
14. Statistics Canada. 2010 and 2009-2010 CCHS Microdata File User Guide. Ottawa (ON): Statistics Canada.

15. Statistics Canada. 2014 and 2013-2014 CCHS Microdata File User Guide. Ottawa (ON): Statistics Canada.
16. Statistics Canada. Canadian Community Health Survey - Healthy Aging (CCHS) [Internet]. Ottawa (ON): Statistics Canada; [updated 2008 Nov 27; cited 2021 Jan 10]. Available from: <https://www23.statcan.gc.ca/imdb/p2SV.pl?Function=getSurvey&SDDS=5146>.
17. Statistics Canada. Canadian Community Health Survey (CCHS) Derived Variable (DV) Specifications. Ottawa (ON): Statistics Canada; [2011 Jun; cited 2021 Jan 10]. Available from: [http://www23.statcan.gc.ca/imdb-bmdi/pub/document/3226\\_D5\\_T9\\_V1-eng.pdf](http://www23.statcan.gc.ca/imdb-bmdi/pub/document/3226_D5_T9_V1-eng.pdf).
18. Statistics Canada. Canadian Community Health Survey (CCHS) Household Weights Documentation. Ottawa (ON): Statistics Canada; [2010 May; cited 2021 Jan 10]. Available from: [https://www23.statcan.gc.ca/imdb-bmdi/pub/document/3226\\_D57\\_T9\\_V1-eng.htm](https://www23.statcan.gc.ca/imdb-bmdi/pub/document/3226_D57_T9_V1-eng.htm).
19. Naing NN. Easy way to learn standardization : direct and indirect methods. *Malays J Med Sci.* 2000;7(1):10-5.
20. Thomas S, Wannell B. Combining cycles of the Canadian Community Health Survey. *Health Rep.* 2009;20(1):53-8.
21. Boyle P, Parkin DM. Cancer registration: principles and methods. *Statistical methods for registries.* IARC Sci Publ. 1991;95:126-58.
22. Szklo, & Nieto, F. J. (2019). *Epidemiology : beyond the basics* (Fourth edition.). Jones & Bartlett Learning.
23. Delcourt C, Le Goff M, von Hanno T, Mirshahi A, Khawaja AP, Verhoeven VJM, et al. The Decreasing Prevalence of Nonrefractive Visual Impairment in Older Europeans: A Meta-analysis of Published and Unpublished Data. *Ophthalmology.* 2018;125(8):1149-59.
24. Flaxman SR, Bourne RRA, Resnikoff S, Ackland P, Braithwaite T, Cicinelli MV, et al. Global causes of blindness and distance vision impairment 1990–2020: a systematic review and meta-analysis. *Lancet Glob Health.* 2017;5(12):e1221-e1234.
25. Norris KL, Beckles GL, Chou CF, Zhang X, Saaddine J. Association of Socioeconomic Status with Eye Health Among Women With and Without Diabetes. *J Womens Health (Larchmt).* 2016;25(3):321-6.
26. Yan X, Chen L, Yan H. Socio-economic status, visual impairment and the mediating role of lifestyles in developed rural areas of China. *PLoS One.* 2019;14(4):e0215329.
27. Perruccio AV, Badley EM, Trope GE. A Canadian population-based study of vision problems: Assessing the significance of socioeconomic status. *Can J Ophthalmol.* 2010;45(5):477-83.
28. Pampel FC, Krueger PM, Denney JT. Socioeconomic Disparities in Health Behaviors. *Annu Rev Sociol.* 2010 Aug;36:349-70.
29. Mcmaughan DJ, Oloruntopa O, Smith ML. Socioeconomic Status and Access to Healthcare: Interrelated Drivers for Healthy Aging. *Front Public Health.* 2020;8:231.
30. Ballios BG, Park T, Chaudhary V, Hurley B, Kosar S, Sheidow T, et al. Identifying gaps in patient access to diabetic screening eye examinations in Ontario: a provincially representative cross-sectional study. *Can J Ophthalmol.* 2021;56(4):223-30.
31. Egunsola O, Dowsett LE, Diaz R, Brent MH, Rac V, Clement FM. Diabetic Retinopathy Screening: A Systematic Review of Qualitative Literature. *Can J Diabetes.* 2021;45(8):725-33.

- 1  
2  
3 32. Leese GP, Boyle P, Feng Z, Emslie-Smith A, Ellis JD. Screening uptake in a well-established  
4 diabetic retinopathy screening program: the role of geographical access and deprivation.  
5 *Diabetes Care*. 2008;31(11):2131-5.  
6  
7 33. Maberley DAL, Koushik A, Cruess AF. Factors associated with missed eye examinations in  
8 a cohort with diabetes. *Can J Public Health*. 2002;93(3):229–32.  
9  
10 34. Felfeli T, Alon R, Merritt R, Brent MH. Toronto tele-retinal screening program for detection  
11 of diabetic retinopathy and macular edema. *Can J Ophthalmol*. 2019;54(2):203-11.  
12  
13 35. Goto A, Morita A, Goto M, Sasaki S, Miyachi M, Aiba M, et al. Validity of diabetes self-  
14 reports in the Saku diabetes study. *J Epidemiol*. 2013;23(4):295-300.  
15  
16 36. Yuan X, Liu T, Wu L, Zou Z-Y, Li C. Validity of self-reported diabetes among middle-aged  
17 and older Chinese adults: the China Health and Retirement Longitudinal Study. *BMJ Open*.  
18 2015;5(4):e006633.  
19  
20 37. de Menezes TN, Oliveira ECT. Validity and concordance of self-reported diabetes mellitus  
21 by the elderly. *Cien Saude Colet*. 2019;24(1):27-34.  
22  
23  
24  
25  
26  
27  
28  
29  
30  
31  
32  
33  
34  
35  
36  
37  
38  
39  
40  
41  
42  
43  
44  
45  
46  
47  
48  
49  
50  
51  
52  
53  
54  
55  
56  
57  
58  
59  
60

1  
2  
3 **Figure Legend**

4 **Figure 1.** The age- and sex-standardized prevalence of visual impairment in the 10 Canadian  
5 provinces from 1994 to 2014

6  
7 **Figure 2.** The sex-standardized prevalence of visual impairment in the 10 Canadian provinces  
8 stratified by education levels from 1994 to 2014. **A.** Low level of education. **B.** Mid/high level of  
9 education

10 **Figure 3.** The sex-standardized prevalence of visual impairment in the 10 Canadian provinces  
11 stratified by household income levels from 1994 to 2014. **A.** Low level of household income. **B.**  
12 Mid/high level of household income  
13  
14  
15  
16  
17  
18  
19  
20  
21  
22  
23  
24  
25  
26  
27  
28  
29  
30  
31  
32  
33  
34  
35  
36  
37  
38  
39  
40  
41  
42  
43  
44  
45  
46  
47  
48  
49  
50  
51  
52  
53  
54  
55  
56  
57  
58  
59  
60

Confidential

1  
2  
3  
4  
5  
6  
7  
8  
9  
10  
11  
12  
13  
14  
15  
16  
17  
18  
19  
20  
21  
22  
23  
24  
25  
26  
27  
28  
29  
30  
31  
32  
33  
34  
35  
36  
37  
38  
39  
40  
41  
42  
43  
44  
45  
46  
47

**Table 1.** Weighted characteristics of participants aged 45+ in the National Population Health Survey (NPHS) and the Canadian Community Health Survey (CCHS) with and without diabetes, 1994-2014

| <b>People with Diabetes</b>                |                                    |       |                                      |       |                                    |       |                                      |       |                                      |       |                                      |       |                                       |       |
|--------------------------------------------|------------------------------------|-------|--------------------------------------|-------|------------------------------------|-------|--------------------------------------|-------|--------------------------------------|-------|--------------------------------------|-------|---------------------------------------|-------|
| NPHS and CCHS Cycles                       |                                    |       |                                      |       |                                    |       |                                      |       |                                      |       |                                      |       |                                       |       |
|                                            | 1994/1995<br>(unweighted<br>n=525) |       | 1996/1997<br>(unweighted<br>n=2,322) |       | 1998/1999<br>(unweighted<br>n=537) |       | 2000/2001<br>(unweighted<br>n=5,431) |       | 2008/2009<br>(unweighted<br>n=4,384) |       | 2009/2010<br>(unweighted<br>n=8,866) |       | 2013/2014<br>(unweighted<br>n=10,566) |       |
|                                            | n                                  | %     | n                                    | %     | n                                  | %     | n                                    | %     | n                                    | %     | n                                    | %     | n                                     | %     |
|                                            | (100's)                            |       | (100's)                              |       | (100's)                            |       | (100's)                              |       | (100's)                              |       | (100's)                              |       | (100's)                               |       |
| <b>Age</b>                                 |                                    |       |                                      |       |                                    |       |                                      |       |                                      |       |                                      |       |                                       |       |
| 45-64                                      | 2438                               | 40.2  | 3109                                 | 46.5  | 3231                               | 44.7  | 4356                                 | 48.5  | 7986                                 | 51.5  | 7715                                 | 49.2  | 8478                                  | 47.8  |
| 65-74                                      | 2272                               | 37.4  | 2064                                 | 30.9  | 2177                               | 30.1  | 2767                                 | 30.8  | 4239                                 | 27.3  | 4347                                 | 27.7  | 5400                                  | 30.5  |
| 75+                                        | 1361                               | 22.4  | 1511                                 | 22.6  | 1824                               | 25.2  | 1855                                 | 20.7  | 3280                                 | 21.2  | 3615                                 | 23.1  | 3845                                  | 21.7  |
| 45+                                        | 6071                               | 100.0 | 6683                                 | 100.0 | 7232                               | 100.0 | 8978                                 | 100.0 | 15505                                | 100.0 | 15677                                | 100.0 | 17722                                 | 100.0 |
| <b>Sex</b>                                 |                                    |       |                                      |       |                                    |       |                                      |       |                                      |       |                                      |       |                                       |       |
| Male                                       | 3102                               | 51.1  | 3655                                 | 54.7  | 3868                               | 53.5  | 4752                                 | 52.9  | 8198                                 | 52.9  | 8881                                 | 56.6  | 9827                                  | 55.5  |
| Female                                     | 2969                               | 48.9  | 3027                                 | 45.3  | 3365                               | 46.5  | 4226                                 | 47.1  | 7307                                 | 47.1  | 6796                                 | 43.4  | 7895                                  | 44.5  |
| <b>Annual Household Income*</b>            |                                    |       |                                      |       |                                    |       |                                      |       |                                      |       |                                      |       |                                       |       |
| Low Income                                 | 2044                               | 33.7  | 2952                                 | 44.2  | 3557                               | 49.2  | 3638                                 | 40.5  | 5762                                 | 37.2  | 5516                                 | 35.2  | 7230                                  | 40.8  |
| Mid/High Income                            | 3713                               | 61.2  | 2633                                 | 39.4  | 3177                               | 43.9  | 4295                                 | 47.8  | 7026                                 | 45.3  | 7205                                 | 46.0  | 10488                                 | 59.2  |
| Missing                                    | 314                                | 5.2   | 1097                                 | 16.4  | 498                                | 6.9   | 1045                                 | 11.6  | 2717                                 | 17.5  | 2956                                 | 18.9  | 4                                     | 0.0   |
| <b>Highest Level of Education Achieved</b> |                                    |       |                                      |       |                                    |       |                                      |       |                                      |       |                                      |       |                                       |       |
| No Post-Secondary Education                | 3896                               | 64.2  | 4159                                 | 62.2  | 4422                               | 61.1  | 5522                                 | 61.5  | 8260                                 | 53.3  | 7321                                 | 46.7  | 8660                                  | 48.9  |
| Post-Secondary Education or higher         | 2055                               | 33.8  | 2472                                 | 37.0  | 2773                               | 38.3  | 3341                                 | 37.2  | 6941                                 | 44.8  | 7768                                 | 49.6  | 8557                                  | 48.3  |
| Missing                                    | 120                                | 2.0   | 52                                   | 0.8   | 37                                 | 0.5   | 115                                  | 1.3   | 304                                  | 2.0   | 587                                  | 3.7   | 506                                   | 2.9   |
| <b>Visual Impairment</b>                   |                                    |       |                                      |       |                                    |       |                                      |       |                                      |       |                                      |       |                                       |       |
| Yes                                        | 572                                | 9.4   | 473                                  | 7.1   | 525                                | 7.3   | 521                                  | 5.8   | 567                                  | 3.7   | 470                                  | 3.0   | 539                                   | 3.0   |



|                                            |                                      |       |                                       |       |                                      |       |                                       |       |                                       |       |                                       |       |                                       |       |
|--------------------------------------------|--------------------------------------|-------|---------------------------------------|-------|--------------------------------------|-------|---------------------------------------|-------|---------------------------------------|-------|---------------------------------------|-------|---------------------------------------|-------|
| No                                         | 5431                                 | 89.4  | 6188                                  | 92.6  | 6705                                 | 92.7  | 8420                                  | 93.8  | 14819                                 | 95.6  | 15060                                 | 96.1  | 16943                                 | 95.6  |
| Missing                                    | 69                                   | 1.1   | 22                                    | 0.3   | 3                                    | 0.0   | 36                                    | 0.4   | 119                                   | 0.8   | 147                                   | 0.9   | 241                                   | 1.4   |
| <b>People without Diabetes</b>             |                                      |       |                                       |       |                                      |       |                                       |       |                                       |       |                                       |       |                                       |       |
| NPHS and CCHS Cycles                       |                                      |       |                                       |       |                                      |       |                                       |       |                                       |       |                                       |       |                                       |       |
|                                            | 1994/1995<br>(unweighted<br>n=7,059) |       | 1996/1997<br>(unweighted<br>n=30,039) |       | 1998/1999<br>(unweighted<br>n=6,410) |       | 2000/2001<br>(unweighted<br>n=55,156) |       | 2008/2009<br>(unweighted<br>n=26,468) |       | 2009/2010<br>(unweighted<br>n=59,771) |       | 2013/2014<br>(unweighted<br>n=66,466) |       |
|                                            | n                                    | %     | n                                     | %     | n                                    | %     | n                                     | %     | n                                     | %     | n                                     | %     | n                                     | %     |
|                                            | (100's)                              |       | (100's)                               |       | (100's)                              |       | (100's)                               |       | (100's)                               |       | (100's)                               |       | (100's)                               |       |
| <b>Age</b>                                 |                                      |       |                                       |       |                                      |       |                                       |       |                                       |       |                                       |       |                                       |       |
| 40-64                                      | 57140                                | 66.5  | 60218                                 | 66.3  | 63541                                | 67.3  | 68222                                 | 68.2  | 84602                                 | 70.1  | 86033                                 | 70.2  | 89101                                 | 67.6  |
| 65-74                                      | 18289                                | 21.3  | 18888                                 | 20.8  | 17747                                | 18.8  | 18762                                 | 18.8  | 19833                                 | 16.4  | 21020                                 | 17.2  | 25719                                 | 19.5  |
| 75+                                        | 10536                                | 12.3  | 11685                                 | 12.9  | 13059                                | 13.8  | 13003                                 | 13.0  | 16314                                 | 13.5  | 15461                                 | 12.6  | 16902                                 | 12.8  |
| 45+                                        | 85964                                | 100.0 | 90791                                 | 100.0 | 94346                                | 100.0 | 99987                                 | 100.0 | 120749                                | 100.0 | 122515                                | 100.0 | 131722                                | 100.0 |
| <b>Sex</b>                                 |                                      |       |                                       |       |                                      |       |                                       |       |                                       |       |                                       |       |                                       |       |
| Male                                       | 40519                                | 47.1  | 42634                                 | 47.0  | 44375                                | 47.0  | 47062                                 | 47.1  | 57284                                 | 47.4  | 57639                                 | 47.0  | 62392                                 | 47.4  |
| Female                                     | 45445                                | 52.9  | 48157                                 | 53.0  | 49972                                | 53.0  | 52925                                 | 52.9  | 63465                                 | 52.6  | 64876                                 | 53.0  | 69330                                 | 52.6  |
| <b>Annual Household Income*</b>            |                                      |       |                                       |       |                                      |       |                                       |       |                                       |       |                                       |       |                                       |       |
| Low Income                                 | 21201                                | 24.7  | 29913                                 | 32.9  | 31363                                | 33.2  | 26440                                 | 26.4  | 28414                                 | 23.5  | 28848                                 | 23.5  | 36393                                 | 27.6  |
| Mid/High Income                            | 60114                                | 69.9  | 44667                                 | 49.2  | 55883                                | 59.2  | 61970                                 | 62.0  | 71573                                 | 59.3  | 72301                                 | 59.0  | 95299                                 | 72.3  |
| Missing                                    | 4649                                 | 5.4   | 16211                                 | 17.9  | 7100                                 | 7.5   | 11578                                 | 11.6  | 20762                                 | 17.2  | 21365                                 | 17.4  | 30                                    | 0.0   |
| <b>Highest Level of Education Achieved</b> |                                      |       |                                       |       |                                      |       |                                       |       |                                       |       |                                       |       |                                       |       |
| No Post-Secondary Education                | 44692                                | 52.0  | 45833                                 | 50.5  | 44915                                | 47.6  | 49601                                 | 49.6  | 48754                                 | 40.4  | 43195                                 | 35.3  | 48942                                 | 37.2  |
| Post-Secondary Education                   | 41105                                | 47.8  | 43878                                 | 48.3  | 49385                                | 52.3  | 49325                                 | 49.3  | 70509                                 | 58.4  | 75587                                 | 61.7  | 80189                                 | 60.9  |
| Missing                                    | 167                                  | 0.2   | 1080                                  | 1.2   | 46                                   | 0.0   | 1062                                  | 1.1   | 1486                                  | 1.2   | 3732                                  | 3.0   | 2591                                  | 2.0   |
| <b>Visual Impairment</b>                   |                                      |       |                                       |       |                                      |       |                                       |       |                                       |       |                                       |       |                                       |       |
| Yes                                        | 3444                                 | 4.0   | 2702                                  | 3.0   | 3452                                 | 3.7   | 2252                                  | 2.3   | 1948                                  | 1.6   | 1961                                  | 1.6   | 2059                                  | 1.6   |
| No                                         | 81801                                | 95.2  | 87689                                 | 96.6  | 90717                                | 96.2  | 97333                                 | 97.3  | 118297                                | 98.0  | 119689                                | 97.7  | 128280                                | 97.4  |

1  
2  
3  
4  
5  
6  
7  
8  
9  
10  
11  
12  
13  
14  
15  
16  
17  
18  
19  
20  
21  
22  
23  
24  
25  
26  
27  
28  
29  
30  
31  
32  
33  
34  
35  
36  
37  
38  
39  
40  
41  
42  
43  
44  
45  
46  
47

|         |     |     |     |     |     |     |     |     |     |     |     |     |      |     |
|---------|-----|-----|-----|-----|-----|-----|-----|-----|-----|-----|-----|-----|------|-----|
| Missing | 720 | 0.8 | 400 | 0.4 | 177 | 0.2 | 403 | 0.4 | 504 | 0.4 | 865 | 0.7 | 1384 | 1.1 |
|---------|-----|-----|-----|-----|-----|-----|-----|-----|-----|-----|-----|-----|------|-----|

\* Low income: an annual household income of \$0-\$19,999 for the 1994/1995 NPHS cycle, \$0-\$29,999 for the 1996/1997 and 1998/1999 NPHS cycles as well as the 2000/2001 CCHS cycle, and \$0-\$39,999 for the 2008/2009, 2009/2010 and 2013/2014 CCHS cycles. In 2013/2014, missing income data were imputed by Statistics Canada.<sup>18</sup>

Confidential

**Table 2.** The observed (95% CI) and expected joint standardized prevalence ratio (SPR) from the additive and multiplicative models in assessing the joint effects of diabetes and level of education (upper part) and level of household income (lower part) on the prevalence of visual impairment (VI)

|                                                               |                      | Observed joint SPR | Expected joint SPR | Suggested presence of interaction             |
|---------------------------------------------------------------|----------------------|--------------------|--------------------|-----------------------------------------------|
| <b>Education+Diabetes+ vs Education-Diabetes<sup>-a</sup></b> |                      |                    |                    |                                               |
| 1994/1997                                                     | Additive Model       | 7.28 (7.25-7.31)   | 4.84               | Positive additive                             |
|                                                               | Multiplicative Model | 3.72 (2.39-5.79)   | 3.50               |                                               |
| 1998/2001                                                     | Additive Model       | 4.22 (4.20-4.24)   | 5.94               | Negative additive and negative multiplicative |
|                                                               | Multiplicative Model | 2.80 (2.11-3.71)   | 4.57               |                                               |
| 2008/2009                                                     | Additive Model       | 2.38 (2.37-2.39)   | 2.75               | Negative additive and negative multiplicative |
|                                                               | Multiplicative Model | 3.05 (2.45-3.80)   | 4.72               |                                               |
| 2009/2010                                                     | Additive Model       | 2.67 (2.66-2.68)   | 1.55               | Positive additive                             |
|                                                               | Multiplicative Model | 3.10 (2.49-3.87)   | 2.59               |                                               |
| 2013/2014                                                     | Additive Model       | 2.36 (2.35-2.37)   | 2.82               | Negative additive and negative multiplicative |
|                                                               | Multiplicative Model | 2.95 (2.42-3.60)   | 4.56               |                                               |
| <b>Income+Diabetes+ vs Income-Diabetes<sup>-b</sup></b>       |                      |                    |                    |                                               |
| 1994/1995                                                     | Additive Model       | 9.48 (9.41-9.55)   | 8.14               | Positive additive                             |
|                                                               | Multiplicative Model | 3.72 (1.94-7.14)   | 4.73               |                                               |
| 1996/1997                                                     | Additive Model       | 5.03 (5.00-5.06)   | 7.76               | Negative additive and negative multiplicative |
|                                                               | Multiplicative Model | 3.32 (2.18-5.05)   | 6.96               |                                               |
| 1998/2001                                                     | Additive Model       | 6.23 (6.21-6.25)   | 6.01               | Positive additive and negative multiplicative |
|                                                               | Multiplicative Model | 4.08 (2.83-5.89)   | 6.19               |                                               |
| 2008/2009                                                     | Additive Model       | 2.93 (2.91-2.94)   | 3.86               | Negative additive and negative multiplicative |
|                                                               | Multiplicative Model | 4.05 (3.09-5.31)   | 9.06               |                                               |
| 2009/2010                                                     | Additive Model       | 3.01 (3.00-3.02)   | 2.09               | Positive additive                             |

1  
2  
3  
4  
5  
6  
7  
8  
9  
10  
11  
12  
13  
14  
15  
16  
17  
18  
19  
20  
21  
22  
23  
24  
25  
26  
27  
28  
29  
30  
31  
32  
33  
34  
35  
36  
37  
38  
39  
40  
41  
42  
43  
44  
45  
46  
47  
48  
49  
50  
51  
52  
53  
54  
55  
56  
57  
58  
59  
60

|           |                      |                  |      |                   |
|-----------|----------------------|------------------|------|-------------------|
|           | Multiplicative Model | 3.57 (2.84-4.49) | 3.57 |                   |
| 2013/2014 | Additive Model       | 3.39 (3.38-3.40) | 2.86 | Positive additive |
|           | Multiplicative Model | 3.90 (3.06-4.97) | 4.91 |                   |

<sup>a</sup>Education-Diabetes-: Mid/high level of education without diabetes; Education+Diabetes+: Low level of education with diabetes

<sup>b</sup>Income-Diabetes-: Mid/high level of household income without diabetes; Income+Diabetes+: Low level of household income with diabetes

Confidential

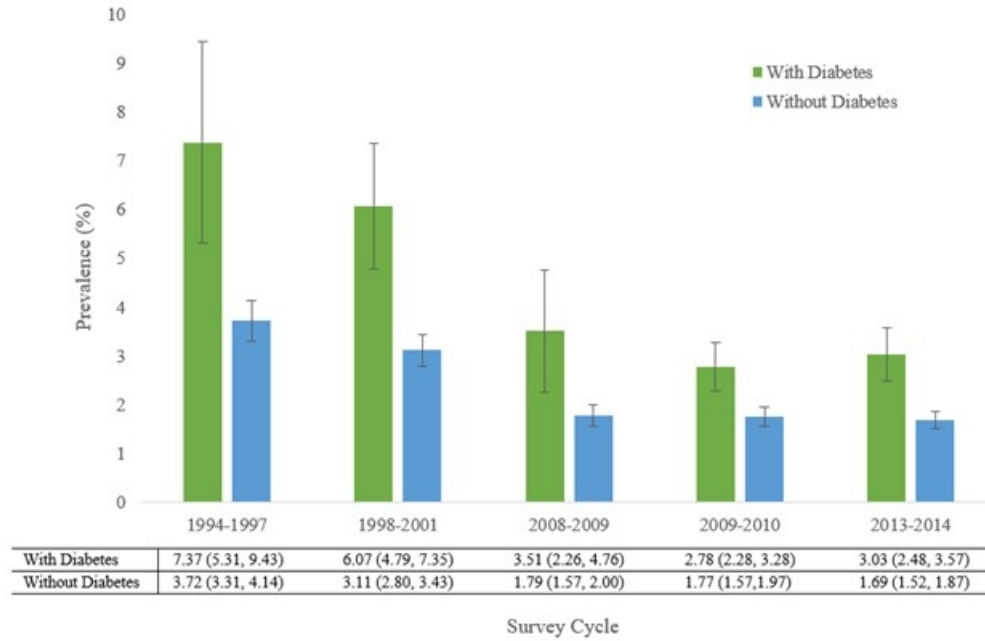

Figure 1. The age- and sex-standardized prevalence of visual impairment in the 10 Canadian provinces from 1994 to 2014

165x106mm (96 x 96 DPI)

1  
2  
3  
4  
5  
6  
7  
8  
9  
10  
11  
12  
13  
14  
15  
16  
17  
18  
19  
20  
21  
22  
23  
24  
25  
26  
27  
28  
29  
30  
31  
32  
33  
34  
35  
36  
37  
38  
39  
40  
41  
42  
43  
44  
45  
46  
47  
48  
49  
50  
51  
52  
53  
54  
55  
56  
57  
58  
59  
60

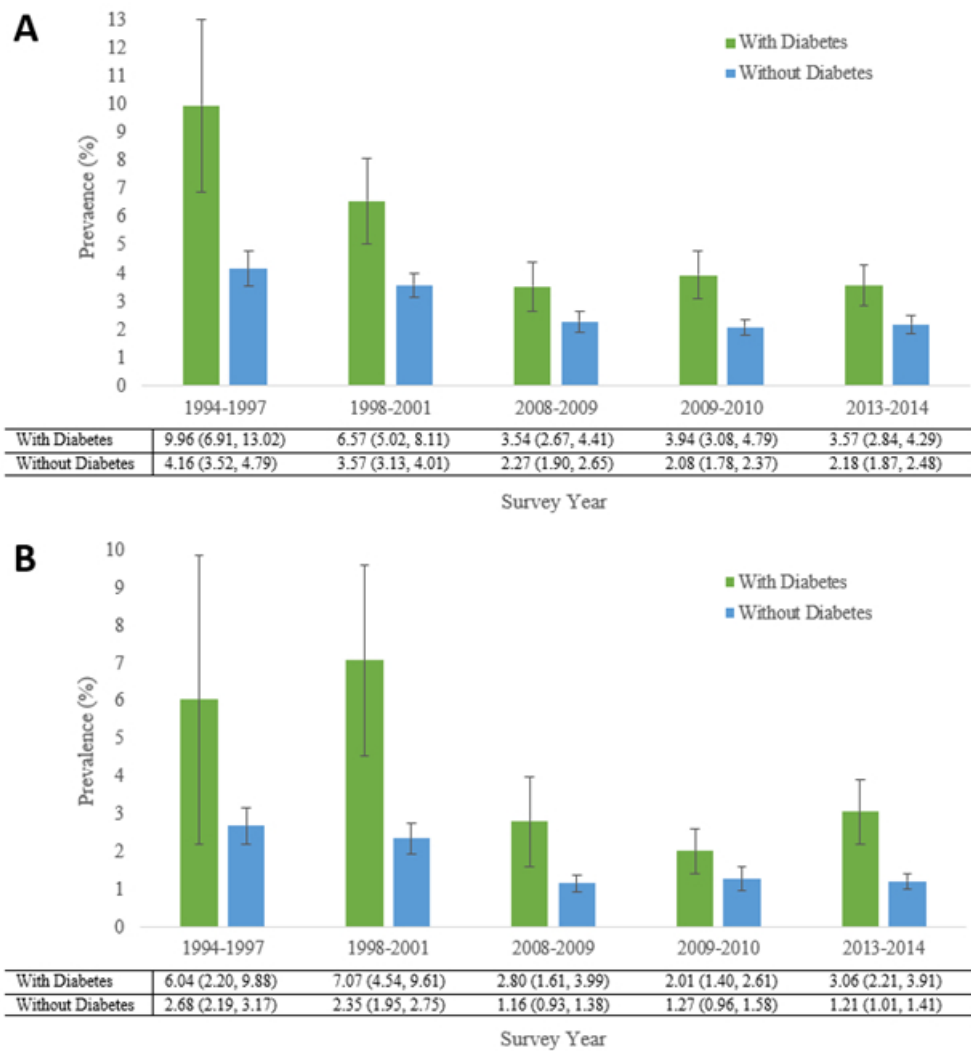

Figure 2. The sex-standardized prevalence of visual impairment in the 10 Canadian provinces stratified by education levels from 1994 to 2014. A. Low level of education. B. Mid/high level of education

417x447mm (38 x 38 DPI)

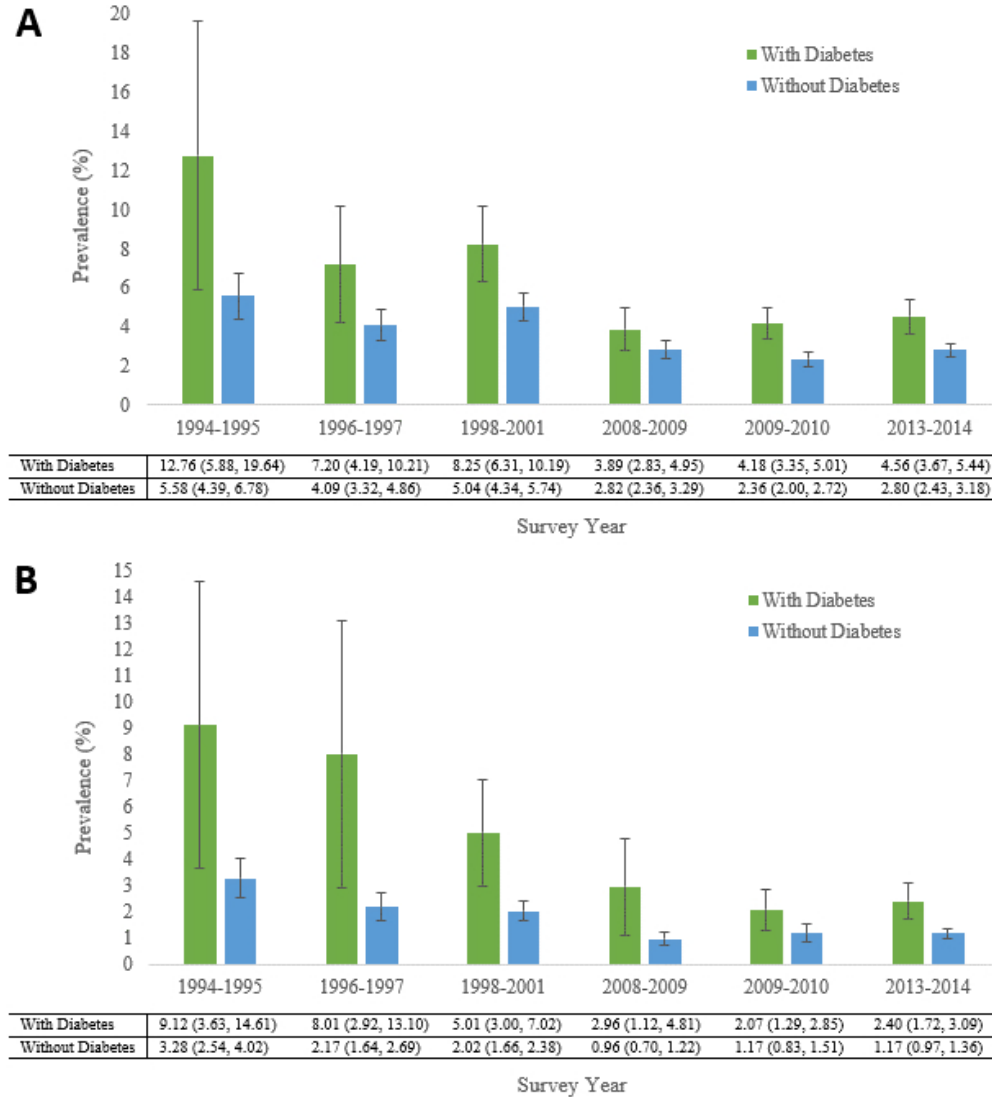

Figure 3. The sex-standardized prevalence of visual impairment in the 10 Canadian provinces stratified by household income levels from 1994 to 2014. A. Low level of household income. B. Mid/high level of household income

408x453mm (38 x 38 DPI)
